## Halothane Changes the Relationships Between Lung Resistances and Lung Volume

Michael J. Joyner, M.D.,\* David O. Warner, M.D.,† Kai Rehder, M.D.‡

The authors hypothesized that relaxation of airway smooth muscle by halothane lessens the dependence of airway resistance on lung volume, and that halothane alters the relationship between pulmonary resistance and lung volume by changing both the airway and tissue components of pulmonary resistance. The relationship among airway resistance, tissue resistance, and lung volume was examined in mongrel dogs before and during the administration of halothane, both in airways with reduced smooth muscle tone (after vagotomy) and during moderate increases in smooth muscle tone caused by vagus nerve stimulation (VNS). Resistances were measured at several levels of positive end-expiratory pressure (PEEP, 4–15 cmH<sub>2</sub>O) using an alveolar capsule technique. Before halothane administration, airway resistance increased at low PEEP; VNS accentuated this increase. Tissue resistance increased at low PEEP only during VNS. Halothane had no significant effect on any resistance before VNS. During VNS, halothane markedly blunted increases in airway resistance and tissue resistance as PEEP decreased. The authors conclude that during stimulation of airway smooth muscle in dogs, halothane attenuates increases in airway resistance and tissue resistance with reductions in lung volume in dogs. Thus, moderate changes in lung volume have little effect on these resistances during halothane anesthesia under these conditions. (Key words: Anesthetics, volatile: halothane. Lungs: airway resistance; alveolar capsules; pulmonary resistance; tissue resistance. Nerve: vagus; stimulation.)

VOLATILE ANESTHETICS may have at least two potentially confounding effects on airway resistance ( $R_{aw}$ ). They relax airway smooth muscle by depression of parasympathetic neural pathways innervating airway smooth muscle and by a direct effect on the muscle and its receptor systems.<sup>1–6</sup> This relaxation of airway smooth muscle should decrease  $R_{aw}$ . However, anesthesia also reduces the functional residual capacity (FRC) in humans.<sup>7</sup> Because  $R_{aw}$  increases as lung volume declines,<sup>8–10</sup> reductions in the FRC should favor increased  $R_{aw}$ . Thus, the net effect of the volatile anesthetics on  $R_{aw}$  should depend on the interaction between the effects of reductions in lung

volume and anesthetic-induced relaxation of airway smooth muscle.

The above considerations have been used to explain unchanged or increased pulmonary resistance ( $R_L$ ) after induction of anesthesia with volatile anesthetics observed in some studies of human subjects.<sup>11–15</sup> However, the relationship between lung volume and  $R_{aw}$  depends on airway smooth muscle tone; relaxation of airway smooth muscle reduces the dependence of  $R_{aw}$  on lung volume.<sup>9,16–19</sup> If the volatile anesthetics relax airway smooth muscle, the reduction in FRC may have little effect on  $R_{aw}$ .

Prediction of changes in  $R_L$  caused by anesthetic-induced changes in lung volume is complicated by another factor. Although most studies of anesthetic effects on smooth muscle tone *in vivo* use  $R_L$  as an index of airway diameter and smooth muscle tone,  $R_L$  is the sum of  $R_{aw}$ , which depends on pressure drops created by gas flow in the airways, and tissue resistance ( $R_{ti}$ ), which depends on the elastic properties of the lung tissue.<sup>20</sup> Like  $R_{aw}$ ,  $R_{ti}$  also depends on both lung volume<sup>21,22</sup> and the tone of airway smooth muscle<sup>18,23,24</sup> and is reduced by volatile anesthetics.<sup>25,26</sup> However, in contrast to  $R_{aw}$ ,  $R_{ti}$  decreases as lung volume decreases.<sup>21,22,24</sup>

The purpose of the present study was to test two hypotheses: 1) halothane reduces the dependence of  $R_{aw}$  on lung volume; and 2) halothane alters the relationship between  $R_L$  and lung volume by changing both airway and tissue components of  $R_L$ . We examined the relationship between these lung resistances and lung volume in dogs before and during the administration of halothane, both in airways with reduced smooth muscle tone (after vagotomy) and during moderate increases in smooth muscle tone caused by electrical stimulation of the vagus nerve.

### Materials and Methods

#### ANIMAL INSTRUMENTATION

This study was approved by the Institutional Animal Care and Use Committee. Six mongrel dogs (15–20 kg) were anesthetized with chloralose (60 mg · kg<sup>-1</sup> intravenously [iv]) and urethane (600 mg · kg<sup>-1</sup> iv), anesthetics that have little effect on increases in  $R_L$  during vagus nerve stimulation (VNS) in dogs.<sup>27</sup> This baseline anesthesia was maintained throughout the experiment by administering supplemental doses of chloralose (5 mg · kg<sup>-1</sup> iv) and ure-

\* Research Fellow in Anesthesiology.

† Assistant Professor of Anesthesiology.

‡ Professor of Anesthesiology and Physiology.

Received from the Departments of Anesthesiology and of Physiology and Biophysics, Mayo Clinic and Mayo Foundation, Rochester, Minnesota. Accepted for publication October 1, 1991. Supported in part by Research Grants HL-45532, GM-40909, and GM-08288 from the National Institutes of Health. Dr. Warner is a recipient of the B. B. Sankey Anesthesia Advancement Award and of the Anesthesiology Young Investigator/Parker B. Francis Investigator Award from the Foundation for Anesthesia Education and Research.

Address reprint requests to Dr. Warner: Department of Anesthesiology, Mayo Clinic, 200 First Street S.W., Rochester, Minnesota 55905.

thane ( $50 \text{ mg} \cdot \text{kg}^{-1}$  iv) every 30–60 min. After endotracheal intubation, the dogs were paralyzed with vecuronium ( $0.5 \text{ mg} \cdot \text{kg}^{-1}$  iv) followed by supplemental doses sufficient to suppress twitch responses to train-of-four femoral nerve stimulation. Vecuronium was used because it has no effect on the vagal motor pathway.<sup>5</sup> The lungs were mechanically ventilated (Harvard 615) using an open system with an inspired oxygen concentration of 30%, a tidal volume of  $15 \text{ ml} \cdot \text{kg}^{-1}$ , a ratio of inspiratory to expiratory times of 1:1, and a breathing frequency of  $15 \text{ breaths} \cdot \text{min}^{-1}$ . The rectal temperature was maintained between  $36$  and  $38^\circ \text{C}$ . We have previously demonstrated that this anesthetic regimen provides a stable response of  $R_L$  to repeated VNS.<sup>5,28</sup>

A median sternotomy was performed to expose the lungs. Positive end-expiratory pressure (PEEP) of  $5 \text{ cmH}_2\text{O}$  was used to maintain an end-expiratory lung volume similar to the FRC of intact dogs.<sup>25,29</sup> Alveolar pressures were measured using a capsule technique previously used by ourselves<sup>25,26,29–31</sup> and others.<sup>24</sup> In this technique, small holes are punched in the underlying pleura, and small capsules are glued on the pleura so that the pressure in a capsule equals the pressure in the alveoli beneath that capsule. The capsules were flanged cylinders with an inner diameter of  $1 \text{ cm}$  and were glued (PermaBond 240) to the visceral lung pleura while the lungs were inflated to a tracheal pressure of  $15 \text{ cmH}_2\text{O}$ . Before capsule attachment, the pleura beneath the capsule was punctured three to six times with a 19-G electrocautery needle to a depth of  $1$ – $2 \text{ mm}$ . Any bleeding caused by pleural puncture was controlled with electrocautery. Capsule pressures were measured by transducers (Statham PM131) connected to each capsule by an  $80\text{-cm}$  length of tubing (PE-200). The capsule-catheter combination has been shown to have adequate frequency response up to  $30 \text{ Hz}$ .<sup>30</sup> Two or three capsules were used in each dog. Capsules were affixed to the ventral surfaces of the right cardiac, right diaphragmatic, and left diaphragmatic lobes.

The cervical vagus nerves were exposed bilaterally, infiltrated with lidocaine, and divided. Electrodes were applied to the distal nerves for later electrical stimulation to provide moderate tone in the airway smooth muscle.<sup>5,6,25,28</sup> To prevent desiccation, the nerves and electrodes were covered with mineral oil. The animals were pretreated with propranolol ( $2 \text{ mg/kg}$ ) to prevent concurrent stimulation of sympathetic fibers in the vagus nerve that would attenuate smooth muscle contraction.<sup>6,18</sup> A femoral arterial catheter was inserted for measurement of blood pressure and arterial blood sampling for gas analysis (Instrumentation Laboratories 1302). The dog was then placed in a volume-displacement body plethysmograph.<sup>28</sup> Alveolar pressure measurements were validated in each capsule by occluding the endotracheal tube while the lung was held at a transpulmonary pressure of

$4 \text{ cmH}_2\text{O}$  and sinusoidally varying the pressure in the plethysmograph.<sup>25</sup> Because there was little or no movement of gas in the lung, tracheal pressure should always equal capsule pressure if the airways are in free communication and if the frequency response of the measurement system is adequate. In properly functioning capsules, there was no difference in magnitude or phase between capsule and tracheal pressures up to  $2 \text{ Hz}$ . Capsule measurements were validated frequently throughout the experiment and at its conclusion. Flow at the airway opening was measured by a heated pneumotachograph (Fleisch 1) coupled to a differential pressure transducer (Validyne MP 45). Tracheal pressure was sensed (Statham PM131) through a catheter (PE-200) with its tip positioned  $3 \text{ cm}$  distal to the tracheal end of the endotracheal tube. A mass spectrometer (Perkin-Elmer 1100A) measured end-tidal halothane concentration.

#### EXPERIMENTAL PROTOCOL

Resistances were measured at four levels of PEEP ( $15$ ,  $10$ ,  $6$ , and  $4 \text{ cmH}_2\text{O}$ , applied in random order) in the absence of halothane (control) and during administration of halothane producing stable end-tidal concentrations of  $0.5$ ,  $1.0$ , and  $1.5 \text{ MAC}$  in random order; actual measured end-tidal halothane concentrations were  $0.46 \pm 0.01\%$  (mean  $\pm$  standard error),  $0.90 \pm 0.01\%$ , and  $1.35 \pm 0.02\%$ , respectively. Each concentration of halothane was maintained for  $20 \text{ min}$  before measurements began. Before each measurement of resistances, the lungs were inflated twice to a tracheal pressure of  $25 \text{ cmH}_2\text{O}$  and then were deflated to the desired PEEP. The difference between this lung volume at a tracheal pressure of  $25 \text{ cmH}_2\text{O}$  and the lung volume at a given level of PEEP was noted. After six control breaths, bilateral VNS ( $25 \text{ volts}$ ,  $3\text{-ms}$  bipolar pulses at  $15 \text{ Hz}$ ) commenced and was maintained for nine breaths. These parameters of VNS were chosen because they produce moderate increases in smooth muscle tone, resulting in an  $R_{aw}$  of approximately  $2 \text{ cmH}_2\text{O} \cdot \text{l}^{-1} \cdot \text{s}$  at  $5 \text{ cmH}_2\text{O}$  PEEP. VNS caused no detectable change in end-expiratory lung volume at any PEEP as measured by the plethysmograph. Arterial blood gases were measured before and after the trials conducted at each dose of halothane. Sodium bicarbonate was given as needed to maintain arterial  $p\text{H} > 7.35$  (requiring a total of  $2.0 \pm 0.2 \text{ mEq/kg}$  during the experiment). The arterial  $P_{\text{CO}_2}$  was maintained between  $35$ – $40 \text{ mmHg}$  by adjusting the tidal volume as necessary.

#### DATA ACQUISITION AND ANALYSIS

All data were written to a chart recorder and digitally sampled at  $100 \text{ Hz}$ . Mean resistances during each condition were calculated by multiple linear regression of the measured variables applied to a linear lung model; this

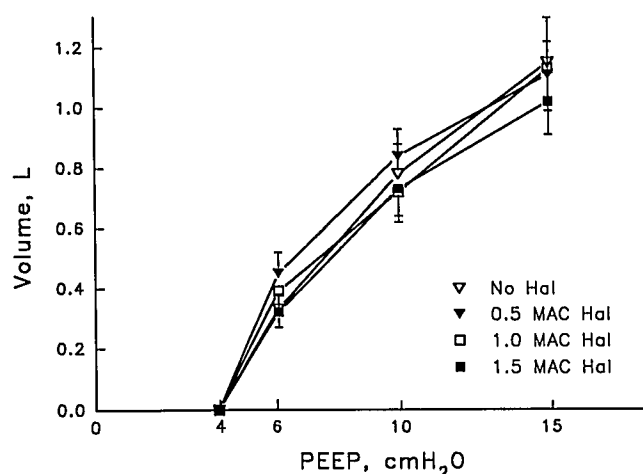

FIG. 1. End-expiratory lung volume as a function of positive end-expiratory pressure (PEEP). Lung volumes are referenced to the lung volume at 4 cmH<sub>2</sub>O PEEP. Values are mean  $\pm$  standard error.

method has been previously described and validated.<sup>25,28,29</sup>  $R_{aw}$ , which depends on airway diameter, was calculated using the difference between mean capsule pressure and tracheal pressure, flow, and changes in lung volume;  $R_{ti}$ , which depends on the elastic properties of the lung tissue, was calculated using the difference between mean alveolar and ambient pressures, flow, and changes in lung volume.  $R_L$  is the sum of  $R_{aw}$  and  $R_{ti}$ . Measurements from a capsule were used to calculate the mean alveolar pressure only if that capsule provided valid measurements throughout the experiment. Reported prestimulation values of resistances were averages of the last three breaths before VNS, while the reported values during VNS were averages of the final six breaths (of a total of nine breaths) during stimulation, a time of maximal, stable response.<sup>5,28</sup>

# STATISTICS

Comparisons were made with repeated-measures analysis of variance using one or two factors as appropriate, with  $P < 0.05$  considered significant. Values reported are mean  $\pm$  standard error.

# Results

## BEFORE HALOTHANE ADMINISTRATION

End-expiratory lung volume decreased as PEEP was reduced (fig. 1). In the absence of halothane and before VNS, both  $R_L$  and  $R_{ti}$  significantly decreased as PEEP was

reduced ( $P < 0.0001$  for each variable), i.e., as end-expiratory lung volume decreased (figs. 2B and 2C; table 1).  $R_{aw}$  consistently increased at the extremes of lung volume, a small but statistically significant effect ( $P = 0.002$ ; fig. 2A and table 1).

Because VNS caused no change in end-expiratory lung volume as measured by the plethysmograph, the relationship between lung volume and PEEP was unchanged by VNS (data not shown). In the absence of halothane, VNS significantly increased  $R_{aw}$ ,  $R_{ti}$ , and  $R_L$  at each level of PEEP ( $P < 0.0001$  for each resistance; table 2). These increases were significantly greater at lower levels of PEEP ( $P < 0.004$  for each resistance; table 2); however, there was little difference between mean increases at 10 and 15 cmH<sub>2</sub>O PEEP. During VNS,  $R_{aw}$  significantly increased

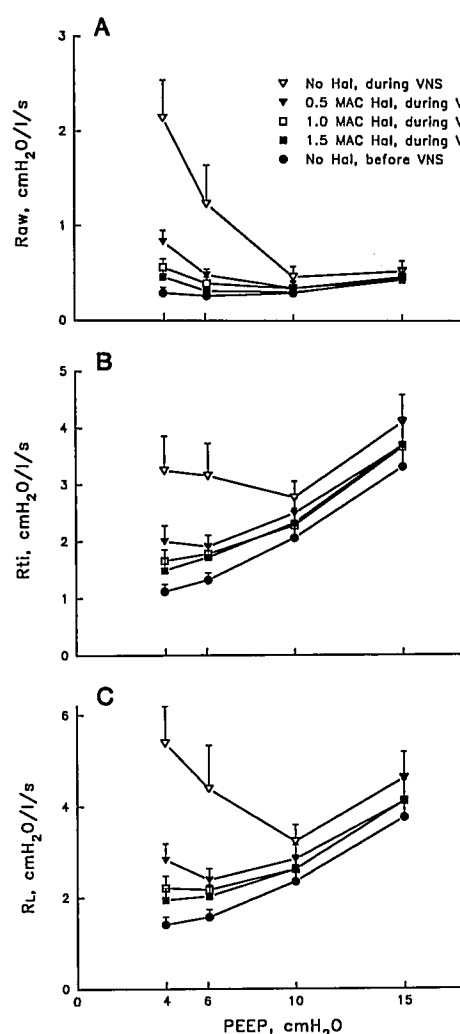

FIG. 2. Airway resistance ( $R_{aw}$ , A), tissue resistance ( $R_{ti}$ , B), and pulmonary resistance ( $R_L$ , C) as a function of positive end-expiratory pressure (PEEP; i.e., lung volume). Closed circles are data before vagus nerve stimulation (VNS) obtained in the absence of halothane; all other symbols are data obtained during VNS. Values are mean  $\pm$  SE.

§ Details of this method, including a discussion of the concept of tissue resistance, have been published previously in this journal (ref. 25).

TABLE 1. Resistances before Vagus Nerve Stimulation

| Variable        | PEEP | Resistances (cmH <sub>2</sub> O · L <sup>-1</sup> · s) |             |             |             |
|-----------------|------|--------------------------------------------------------|-------------|-------------|-------------|
|                 |      | 0 MAC<br>(Control)                                     | 0.5 MAC     | 1.0 MAC     | 1.5 MAC     |
| R <sub>aw</sub> | 4    | 0.29 ± 0.06                                            | 0.27 ± 0.04 | 0.31 ± 0.07 | 0.27 ± 0.04 |
|                 | 6    | 0.26 ± 0.05                                            | 0.23 ± 0.04 | 0.24 ± 0.04 | 0.20 ± 0.03 |
|                 | 10   | 0.29 ± 0.08                                            | 0.24 ± 0.04 | 0.26 ± 0.07 | 0.24 ± 0.05 |
|                 | 15   | 0.45 ± 0.10                                            | 0.39 ± 0.07 | 0.41 ± 0.09 | 0.39 ± 0.06 |
| R <sub>ti</sub> | 4    | 1.12 ± 0.13                                            | 1.13 ± 0.12 | 1.17 ± 0.12 | 1.26 ± 0.15 |
|                 | 6    | 1.32 ± 0.13                                            | 1.35 ± 0.14 | 1.41 ± 0.14 | 1.48 ± 0.18 |
|                 | 10   | 2.06 ± 0.30                                            | 2.04 ± 0.20 | 2.07 ± 0.21 | 2.17 ± 0.28 |
|                 | 15   | 3.31 ± 0.37                                            | 3.11 ± 0.37 | 3.35 ± 0.43 | 3.38 ± 0.44 |
| R <sub>L</sub>  | 4    | 1.41 ± 0.17                                            | 1.40 ± 0.15 | 1.49 ± 0.17 | 1.52 ± 0.19 |
|                 | 6    | 1.57 ± 0.47                                            | 1.58 ± 0.17 | 1.65 ± 0.17 | 1.68 ± 0.21 |
|                 | 10   | 2.35 ± 0.37                                            | 2.28 ± 0.23 | 2.33 ± 0.27 | 2.42 ± 0.32 |
|                 | 15   | 3.76 ± 0.44                                            | 3.50 ± 0.44 | 3.77 ± 0.51 | 3.78 ± 0.50 |

Means ± standard error.

R<sub>aw</sub> = airway resistance; R<sub>ti</sub> = tissue resistance; R<sub>L</sub> = pulmonary resistance; MAC = minimum alveolar concentration.

as PEEP was reduced ( $P = 0.001$ ; fig. 2A). As PEEP was reduced, R<sub>ti</sub> first decreased (as PEEP decreased from 15 to 10 cmH<sub>2</sub>O) and then increased in each dog (fig. 2B). As a result, R<sub>L</sub> (the sum of R<sub>aw</sub> and R<sub>ti</sub>) also first decreased, and then increased as PEEP was reduced in each dog (fig. 2C).

#### DURING HALOTHANE ADMINISTRATION

Halothane had no significant effect on the relationship between lung volume and PEEP ( $P > 0.49$ ; fig. 1). Halothane also had no significant effect on any resistance before VNS over all levels of PEEP ( $P > 0.11$  for each resistance; table 1). Halothane was a significant factor in attenuating the increases in each resistance caused by VNS ( $P < 0.0001$  for each resistance; table 2). There was a significant interaction between halothane dose and the level of PEEP ( $P < 0.0001$  for each resistance), such that

halothane effects were greatest at higher halothane concentrations and at low PEEP.

During VNS, halothane markedly blunted the increases in R<sub>aw</sub> with decreasing PEEP observed in the absence of halothane (fig. 2A). R<sub>aw</sub> at a given level of PEEP depended significantly on halothane dose ( $P < 0.0002$ ). During VNS, halothane attenuated the increases in both R<sub>ti</sub> and R<sub>L</sub> observed as PEEP was reduced below 10 cmH<sub>2</sub>O in the absence of halothane (figs. 2B and 2C). R<sub>ti</sub> and R<sub>L</sub> at a given level of PEEP depended significantly on halothane dose ( $P < 0.001$  for each resistance).

Halothane did not significantly affect any arterial blood gas variable ( $P > 0.05$  for each variable; table 3).

#### Discussion

The principal new finding of this study is that in anesthetized dogs during moderate VNS, halothane in doses

TABLE 2. Increase in Resistances Caused by Vagus Nerve Stimulation

| Variable        | PEEP | Increase in Resistance (cmH <sub>2</sub> O · L <sup>-1</sup> · s) |             |             |             |
|-----------------|------|-------------------------------------------------------------------|-------------|-------------|-------------|
|                 |      | 0 MAC<br>(Control)                                                | 0.5 MAC     | 1.0 MAC     | 1.5 MAC     |
| R <sub>aw</sub> | 4    | 1.85 ± 0.37                                                       | 0.56 ± 0.10 | 0.24 ± 0.03 | 0.19 ± 0.03 |
|                 | 6    | 0.97 ± 0.39                                                       | 0.25 ± 0.03 | 0.16 ± 0.04 | 0.11 ± 0.02 |
|                 | 10   | 0.17 ± 0.04                                                       | 0.10 ± 0.02 | 0.07 ± 0.02 | 0.06 ± 0.01 |
|                 | 15   | 0.08 ± 0.01                                                       | 0.04 ± 0.01 | 0.05 ± 0.01 | 0.03 ± 0.01 |
| R <sub>ti</sub> | 4    | 2.13 ± 0.53                                                       | 0.87 ± 0.24 | 0.48 ± 0.11 | 0.23 ± 0.08 |
|                 | 6    | 1.85 ± 0.53                                                       | 0.56 ± 0.10 | 0.37 ± 0.07 | 0.24 ± 0.03 |
|                 | 10   | 0.72 ± 0.19                                                       | 0.45 ± 0.14 | 0.22 ± 0.06 | 0.15 ± 0.03 |
|                 | 15   | 0.79 ± 0.16                                                       | 0.57 ± 0.07 | 0.30 ± 0.08 | 0.31 ± 0.07 |
| R <sub>L</sub>  | 4    | 3.98 ± 0.71                                                       | 1.43 ± 0.31 | 0.73 ± 0.13 | 0.42 ± 0.08 |
|                 | 6    | 2.82 ± 0.90                                                       | 0.81 ± 0.14 | 0.52 ± 0.11 | 0.34 ± 0.04 |
|                 | 10   | 0.89 ± 0.19                                                       | 0.56 ± 0.15 | 0.29 ± 0.08 | 0.20 ± 0.03 |
|                 | 15   | 0.86 ± 0.17                                                       | 0.61 ± 0.07 | 0.35 ± 0.09 | 0.35 ± 0.07 |

Means ± standard error.

R<sub>aw</sub> = airway resistance; R<sub>ti</sub> = tissue resistance; R<sub>L</sub> = pulmonary resistance; MAC = minimum alveolar concentration.

TABLE 3. Effect of Halothane on Arterial Blood Gas Variables

|                          | 0 MAC       | 0.5 MAC     | 1.0 MAC     | 1.5 MAC     |
|--------------------------|-------------|-------------|-------------|-------------|
| PaCO <sub>2</sub> (mmHg) | 37 ± 2      | 37 ± 2      | 36 ± 2      | 36 ± 2      |
| PaO <sub>2</sub> (mmHg)  | 172 ± 5     | 164 ± 6     | 166 ± 8     | 166 ± 5     |
| pH                       | 7.38 ± 0.02 | 7.38 ± 0.02 | 7.40 ± 0.01 | 7.39 ± 0.02 |

Means ± standard error.

as low as 0.5 MAC reduces the dependence of  $R_{aw}$  on lung volume. Halothane also alters the relationship between  $R_{ti}$  and lung volume. Thus, halothane affects the lung volume dependence of both the airway and tissue components of  $R_L$ .

### RESULTS BEFORE HALOTHANE ADMINISTRATION

The dependence of  $R_{aw}$  on lung volume noted in both humans<sup>8-10</sup> and animals<sup>16-19</sup> has been attributed to the mechanical interaction between airways and the surrounding lung parenchyma.<sup>32</sup> The lung parenchyma is attached to the airways and exerts an outward force that "tethers" the airways, helping maintain airway patency. As lung volume and consequently lung elastic recoil decrease, this force of interdependence also decreases, tending to decrease airway diameter and thus increase  $R_{aw}$ .

The data before halothane administration are consistent with previous studies of the effects of changes in lung volume on lung resistances in anesthetized dogs.<sup>17-19</sup> After vagotomy,  $R_{aw}$  changed over the range of lung volumes examined, a range that includes the FRC in intact animals (at transpulmonary pressures of approximately 3-5 cmH<sub>2</sub>O,<sup>25,29</sup> although the magnitude of this effect was small. Similar results have been seen in animals with intact vagi, because anesthetized dogs have little resting smooth muscle tone.<sup>17-19</sup> Thus, when there was little smooth muscle tone, changes in lung recoil pressure caused by the changes in lung volume studied in these dogs had only a small effect on airway diameter. The tendency toward an increase in  $R_{aw}$  with increasing lung volume has been previously observed<sup>10,18</sup> and may be caused by longitudinal stretching of the airways or changes in airway fluid dynamics as airway geometry changes.  $R_{aw}$  increases substantially at very low lung volumes as airways collapse<sup>19</sup>; however, these lung volumes were not examined because the alveolar capsules do not reliably function at these lung volumes. For this reason, VNS was applied to produce a moderate increase in smooth muscle tone sufficient to cause a significant dependence of  $R_{aw}$  on lung volume within the range of lung volumes that could be studied using the capsule technique. This moderate increase did not change end-expiratory lung volumes as measured by the body plethysmograph.

When airway smooth muscle tone was increased by VNS in the absence of halothane,  $R_{aw}$  markedly increased as lung volume decreased.<sup>17,19</sup> Apparently, the smaller

forces of interdependence tethering the airways at lower lung volumes allowed greater decreases in airway diameter for a given increase in smooth muscle tone.<sup>31,32</sup> This mechanism would explain the dependence of the relationship between  $R_{aw}$  and lung volume on airway smooth muscle tone. This dependence is also present in human subjects, because  $R_{aw}$  changes less with changes in lung volume when smooth muscle tone is reduced by atropine.<sup>9,10</sup>

Our values of  $R_{ti}$  are similar to those previously reported under comparable conditions in dogs,<sup>24,25,29</sup> confirming that  $R_{ti}$  is the major component of  $R_L$  under these conditions. As in previous studies,  $R_{ti}$  before halothane administration and VNS consistently increased with lung volume<sup>21,22,24,33</sup>; the mechanism responsible for this increase is unknown. During VNS in the absence of halothane, as lung volume decreased,  $R_{ti}$  first decreased (as PEEP decreased from 15 to 10 cmH<sub>2</sub>O, fig. 2B) and then increased (as PEEP decreased to less than 10 cmH<sub>2</sub>O). The initial decrease in  $R_{ti}$  parallels the decrease observed in the absence of VNS, whereas the later increase is similar to the increase in  $R_{aw}$  during VNS observed at lower lung volumes. The mechanisms responsible for increases in  $R_{ti}$  with VNS are not completely understood, but they may involve increases in airway smooth muscle tone that affect the elastic properties of the surrounding attached parenchyma; activation of contractile elements in the parenchyma that change its elastic properties; or changes in surfactant properties and distribution.<sup>23-25,34,35</sup>

### RESULTS DURING HALOTHANE ADMINISTRATION

During halothane administration, the relationships between resistances and lung volume during VNS resembled those relationships after vagotomy (fig. 2). Thus, it is likely that halothane, which relaxes airway smooth muscle during VNS by several mechanisms,<sup>1,5,6</sup> reduced the dependence of resistances on lung volume predominantly by reducing airway smooth muscle tone. In addition to this mechanism, halothane could also affect the elastic recoil of the lung parenchyma or the coupling between the parenchyma and the airways, lessening the influence of lung volume on airway diameter. However, the lack of halothane effect on resistances before VNS (table 1) and on the pressure-volume relationship (fig. 1) makes changes in recoil or coupling unlikely. Halothane may also affect  $R_{ti}$ , which depends on lung elastic properties, by an effect on surfactant; again, the lack of changes in lung recoil in previous studies,<sup>36</sup> the lack of effect on resistances before VNS (table 1), and the lack of effect on the pressure-volume relationship (fig. 1) make this possibility also unlikely. It may be significant that increases in both  $R_{aw}$  and  $R_{ti}$  produced by VNS were greater at low PEEP and that halothane was most effective in attenuating increases in

both variables at low PEEP (figs. 2A and 2B), suggesting that both variables are linked to a common factor (*i.e.*, smooth muscle tone).

#### APPLICATION TO HUMAN SUBJECTS

These results should be applied to human subjects with caution. The induction of general anesthesia in humans has been reported to increase, to decrease, or not to change  $R_{aw}$  and  $R_L$ <sup>11-15,37</sup>; the effect of anesthesia on  $R_{ti}$  in human subjects is unknown. This variation in anesthetic effect is not surprising given the many factors that may influence lung resistances during anesthesia. Anesthetics and adjuvant drugs may directly alter airway smooth muscle tone<sup>1-6</sup> or release histamine and other autacoids. Reflex effects from tracheal intubation or other stimulation may increase smooth muscle tone.<sup>38</sup> Both  $R_{aw}$  and  $R_{ti}$  vary with breathing frequency and tidal volume,<sup>21,22,24,26,29</sup> which may change with the induction of anesthesia. Anesthesia increases lung elastic recoil,<sup>7</sup> which may affect  $R_{aw}$  independently of lung volume. The effects of anesthesia on airway smooth muscle tone, and consequently the relationship between lung resistances and lung volume, depend on the interaction of these factors.

The interpretation of our findings is also affected by the range of lung volumes examined. Our study examined lung volumes corresponding to those at or above FRC in intact animals, when airways remained patent as assessed by the alveolar capsule technique. Decreases in the FRC in human subjects caused by halothane may cause closure of some airways,<sup>7</sup> which may further affect the relationship between  $R_{aw}$  and lung volume. Also, breathing at low lung volumes may cause reflex bronchodilation in human subjects.<sup>39</sup> Thus, our results should be extrapolated to these lower lung volumes with caution. However, our results are consistent with a series of human studies measuring the effects of volatile anesthetics on total respiratory system resistance (the sum of  $R_L$  and chest wall resistance)<sup>40-42</sup> over a wide range of lung volumes (including residual volume). In these studies, the component of the total respiratory system resistance that varies with lung volume was calculated as an estimate of  $R_{aw}$ . Although the use of this variable to estimate changes in  $R_{aw}$  with lung volume is complicated by the dependence of both  $R_{ti}$  and chest wall resistance on lung volume,<sup>22,43</sup> volatile anesthetics reduce the dependence of this variable on lung volume when added to a baseline nitrous oxide-opioid anesthetic.<sup>40-42</sup>

#### CLINICAL SIGNIFICANCE

To the extent that the net effect of anesthesia in human subjects is to relax airway smooth muscle, our results suggest that this relaxation would minimize the effect of lung

volume on lung resistances. Thus, it cannot be assumed that a decrease in FRC caused by anesthesia in human subjects is a mechanism that significantly increases  $R_{aw}$ . If  $R_L$  is considered, explanations involving anesthesia-induced changes in lung volume as a factor influencing  $R_L$  must also account for the tissue component of this resistance. Because of these considerations and because of many other factors that may influence lung resistances during anesthesia, changes in lung volume should be invoked only with caution as a primary mechanism explaining the effects of anesthesia on lung resistances.

The authors thank Jerry Rach and Kathy Street for the expert technical assistance and Janet Beckman for superb secretarial support.

#### References

1. Brichant J-F, Gunst SJ, Warner DO, Rehder K: Halothane, enflurane, and isoflurane depress the peripheral vagal motor pathway in isolated canine tracheal smooth muscle. *ANESTHESIOLOGY* 74:325-332, 1991
2. Hirshman CA, Edelstein G, Peetz S, Wayne R, Downes H: Mechanism of action of inhalational anesthesia on airways. *ANESTHESIOLOGY* 56:107-111, 1982
3. Korenaga S, Takeda K, Ito Y: Differential effects of halothane on airway nerves and muscle. *ANESTHESIOLOGY* 60:309-318, 1984
4. Shah MV, Hirshman CA: Mode of action of halothane on histamine-induced airway constriction in dogs with reactive airways. *ANESTHESIOLOGY* 65:170-174, 1986
5. Vettermann J, Beck KC, Lindahl SGE, Brichant J-F, Rehder K: Actions of enflurane, isoflurane, vecuronium, atracurium, and pancuronium on pulmonary resistance in dogs. *ANESTHESIOLOGY* 69:688-695, 1988
6. Warner DO, Vettermann J, Brichant J-F, Rehder K: Direct and neurally mediated effects of halothane on pulmonary resistance *in vivo*. *ANESTHESIOLOGY* 72:1057-1063, 1990
7. Rehder K, Marsh HM: Respiratory mechanics during anesthesia and mechanical ventilation, *Handbook of Physiology. Mechanics of Breathing, Section 3, Volume III, Part 2*. Edited by Macklem PT, Mead J. Bethesda, American Physiological Society, 1986, 737-752
8. Briscoe WA, DuBois AB: The relationship between airway resistance, airway conductance and lung volume in subjects of different age and body size. *J Clin Invest* 37:1279-1285, 1958
9. Butler J, Caro CG, Alcalá R, DuBois AB: Physiological factors affecting airway resistance in normal subjects and in patients with obstructive respiratory disease. *J Clin Invest* 39:584-591, 1960
10. Vincent NJ, Knudson R, Leith DE, Macklem PT, Mead J: Factors influencing pulmonary resistance. *J Appl Physiol* 29:236-243, 1970
11. Dohi S, Gold MI: Pulmonary mechanics during general anaesthesia. *Br J Anaesth* 51:205-213, 1979
12. Gold MI, Helrich M: Mechanics of breathing during anesthesia. 2. The influence of airway adequacy. *ANESTHESIOLOGY* 26:751-755, 1965
13. Hedenstierna G, McCarthy G: Mechanics of breathing, gas distribution and functional residual capacity at different frequencies of respiration during spontaneous and artificial ventilation. *Br J Anaesth* 47:706-711, 1975
14. Patterson RW, Sullivan SF, Malm JR, Bowman FOJ, Papper EM:

- The effect of halothane on human airway mechanics. *ANESTHESIOLOGY* 29:900-907, 1968
15. Rehder K, Mallow JE, Fibuch EE, Krabill DR, Sessler AD: Effects of isoflurane anesthesia and muscle paralysis on respiratory mechanics in normal man. *ANESTHESIOLOGY* 41:477-485, 1974
  16. Hahn HL, Graf PD, Nadel JA: Effect of vagal tone on airway diameters and on lung volume in anesthetized dogs. *J Appl Physiol* 41:581-589, 1976
  17. Hoppin FG, Green M, Morgan MS: Relationship of central and peripheral airway resistance to lung volume in dogs. *J Appl Physiol* 44:728-737, 1978
  18. Inoue H, Ishii TF, Inoue C, Matsumoto N, Sasaki H, Takishima T: Sympathetic and parasympathetic nervous control of airway resistance in dog lungs. *J Appl Physiol* 54:1496-1504, 1983
  19. Woolcock A, Macklem PT, Hogg JC, Wilson NJ, Nadel JA, Frank NR, Brain J: Effect of vagal stimulation on central and peripheral airways in dogs. *J Appl Physiol* 26:806-813, 1969
  20. Marshall R, DuBois AB: The measurement of the viscous resistance of the lung tissues in normal man. *Clin Sci* 15:161-170, 1956
  21. Bachofen H: Lung tissue resistance and pulmonary hysteresis. *J Appl Physiol* 24:296-301, 1968
  22. Hildebrandt J: Dynamic properties of air-filled excised cat lung determined by liquid plethysmograph. *J Appl Physiol* 27:246-250, 1969
  23. Loring SH, Drazen JM, Smith JC, Hoppin FG Jr: Vagal stimulation and aerosol histamine increase hysteresis of lung recoil. *J Appl Physiol* 51:477-484, 1981
  24. Ludwig MS, Dreshaj I, Solway J, Munoz A, Ingram Jr RH: Partitioning of pulmonary resistance during constriction in the dog: Effects of volume history. *J Appl Physiol* 62:807-815, 1987
  25. Warner DO, Vettermann J, Brusasco V, Rehder K: Pulmonary resistance during halothane anesthesia is not determined only by airway caliber. *ANESTHESIOLOGY* 70:453-460, 1989
  26. Vettermann J, Warner DO, Brichant J-F, Rehder K: Halothane decreases both tissue and airway resistances in excised canine lungs. *J Appl Physiol* 66:2698-2703, 1989
  27. Holtzman MJ, Hahn HL, Saski K, Skoogh BE, Graf PD, Fabbri LM, Nadel JA: Selective effect of general anesthetics on reflex bronchoconstrictor responses in dogs. *J Appl Physiol* 53:126-133, 1982
  28. Beck KC, Vettermann J, Flavahan NA, Rehder K: Muscarinic M1 receptors mediate the increase in pulmonary resistance during vagus nerve stimulation in dogs. *Am Rev Respir Dis* 136:1135-1139, 1987
  29. Brusasco V, Warner DO, Beck KC, Rodarte JR, Rehder K: Partitioning of pulmonary resistance in dogs: effect of tidal volume and frequency. *J Appl Physiol* 66:1190-1196, 1989
  30. Warner DO, Hyatt RE, Rehder K: Inhomogeneity during deflation of excised canine lungs: I. Alveolar pressures. *J Appl Physiol* 65:1757-1765, 1988
  31. Gunst SJ, Warner DO, Wilson TA, Hyatt E: Parenchymal interdependence and airway response to methacholine in excised dog lobes. *J Appl Physiol* 65:2490-2497, 1988
  32. Mead J, Takishima T, Leith D: Stress distribution in the lungs: a model of pulmonary elasticity. *J Appl Physiol* 28:596-608, 1970
  33. Gustin P, Lomba F, Bakima J, Lekeux P, Van de Woestijne KP: Partitioning of pulmonary resistance in calves. *J Appl Physiol* 62:1826-1831, 1987
  34. Kapanci Y, Assimacopoulos A, Irele C, Zwahlen A, Gabbiani G: "Contractile interstitial cells" in pulmonary alveolar septa: A possible regulator of ventilation/perfusion ratio? Ultrastructural, immunofluorescence, and in vitro studies. *J Cell Biol* 60:375-392, 1974
  35. Smith JC, Butler JP, Hoppin FG Jr: Contribution of tree structures in the lung to lung elastic recoil. *J Appl Physiol* 57:1422-1429, 1984
  36. Woo SW, Berlin D, Buch U, Hedley-White J: Altered perfusion, ventilation, anesthesia, and lung-surface forces in dogs. *ANESTHESIOLOGY* 33:411-418, 1970
  37. Gold MI, Han YH, Helrich M: Pulmonary mechanics during anesthesia: III. Influence of intermittent positive pressure and relation to blood gases. *Anesth Analg* 45:631-641, 1966
  38. Gal TJ, Suratt PM: Resistance to breathing in healthy subjects following endotracheal intubation under topical anesthesia. *Anesth Analg* 59:270-274, 1980
  39. Douglas NJ, Drummond GB, Sudlow MF: Breathing at low lung volumes and chest strapping: A comparison of lung mechanics. *J Appl Physiol* 50:650-657, 1981
  40. Heneghan CPH, Bergman NA, Jordan C, Lehane JR, Catley DM: Effect of isoflurane on bronchomotor tone in man. *Br J Anaesth* 58:24-28, 1986
  41. Jordan C, Lehane JR, Jones JG, Altman DG, Royston JP: Specific conductance using forced airflow oscillation in mechanically ventilated human subjects. *J Appl Physiol* 51:715-724, 1981
  42. Lehane JR, Jordan C, Jones JG: Influence of halothane and enflurane on respiratory airflow resistance and specific conductance in anaesthetized man. *Br J Anaesth* 52:773-781, 1980
  43. Jackson AC, Watson JW, Kotlikoff MI: Respiratory system, lung, and chest wall impedances in anesthetized dogs. *J Appl Physiol* 57:34-39, 1984
